# Supplementary material
Source: bioRxiv or medRxiv preprint supplement (https://medrxiv.org/content/medrxiv/early/2021/03/31/2021.03.30.21254635/DC1/embed/media-1.pdf)
Supplement: Supplementary file [file media-1.pdf]

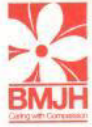

**ETHICS COMMITTEE ON HUMAN RESEARCH  
BHAGWAN MAHAVEER JAIN HOSPITAL**

**A UNIT OF BHAGWAN MAHAVEER MEMORIAL JAIN TRUST**

Millers Road, Vasanthnagar, Bangalore - 560 052.

☎ : 4087 5555 (30 Lines), 4110 0550, Fax: 080 2226 1153

e-mail : bmjh.mdoffice@gmail.com

BMJH/ECHR/29/2020

August 6, 2020

To,

Dr. Archana B

Department of Pulmonary Medicine

Bhagwan Mahaveer Jain Hospital,

Girinagar, Bangalore

Dear Dr. Archana B

**Sub : Ethics Committee Approval – Reg**

The BMJH Ethics Committee on Human Research, Millers Road, Vasanthnagar, Bangalore 560 052, has reviewed and discussed the said Cross Sectional Study title *Validity of markers and indexes of systemic inflammation in predicting mortality in COVID 19 infection – A cross sectional study* conducted at Bhagwan Mahaveer Jain Hospital, Girinagar Branch, Bangalore, and submitted by you to The BMJH Ethics Committee for approval for publication in the Indian Journal Of Critical Care Medicine.

The BMJH Ethics Committee has reviewed the same and Approval has been accorded to you to submit the Study Paper to the Indian Society Of Critical care Medicine for publication in the Indian Journal Of Critical Care Medicine.

It is understood that this is not a clinical trial and there is no financial implication in the conduct of this study.

You are requested to kindly maintain confidentiality of patient identifications while submitting your paper for publication

I hereby confirm that this Ethics Committee is organized and operates according to ICH- GCP, Schedule "Y" Guidelines and the applicable laws and regulations.

Yours sincerely,

**DR. (WG CDR) M. D. MARKER MBBS, MHA**

**MEMBER SECRETARY,**

Bhagwan Mahaveer Jain Hospital Ethics Committee,

Bhagwan Mahaveer Jain Hospital

Millers Road, Vasanthnagar

Bangalore – 560 052

Member Secretary  
Ethics Committee on Human Research  
Bhagwan Mahaveer Jain Hospital  
Miller's Road, Vasanthnagar  
Bangalore-560 052
